# Supplementary material for: Stability and electronic structures of triazine-based carbon nitride nanotubes
Source: Royal Society of Chemistry journal article supplement (doi:10.1039/c4ra15034a), 2015-01-01

## Stability and Electronic Structures of Triazine-Based Carbon Nitride Nanotubes

*Fazel Shojaei*<sup>1</sup>

<sup>1</sup>Department of Chemistry and Bioactive Material Sciences and Research Institute of Physics and Chemistry, Jeonbuk National University, Chonju, Chonbuk 561-756, Republic of Korea

and

*Hong Seok Kang*<sup>2,\*</sup>

<sup>2</sup>Department of Nano and Advanced Materials, College of Engineering, Jeonju University, Hyoja-dong, Wansan-ku, Chonju, Chonbuk 560-759, Republic of Korea

\*Corresponding author: [hsk@jj.ac.kr](mailto:hsk@jj.ac.kr)

**Figure S1.** Comparison of the diameter ( $d$ ) versus the chirality index  $n$  for  $(n,n)$  and  $(n, 0)$  TACNNTs and CNTs. Blue and red labels in the horizontal axis represent those for armchair and zigzag tubes, respectively.

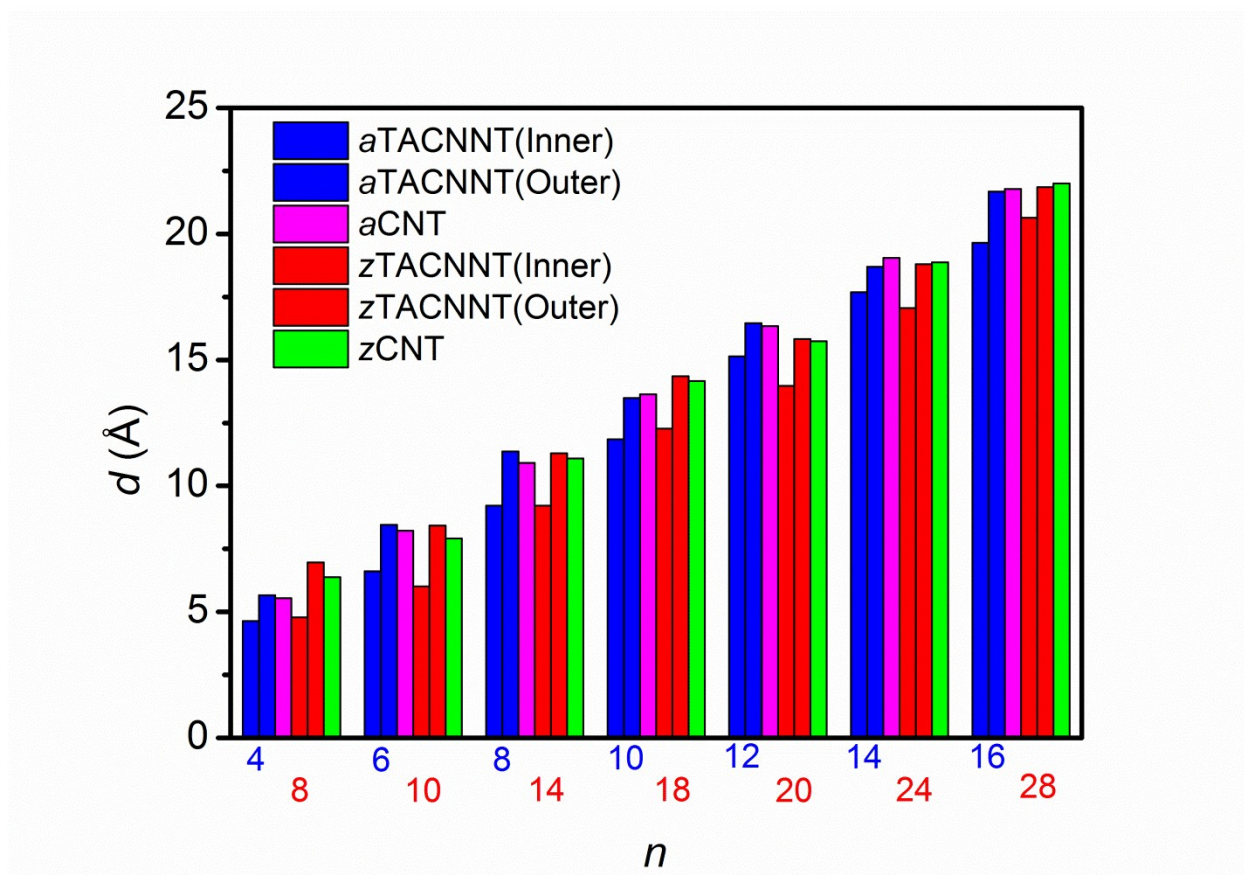

**Figure S2.** The band structures of (8,8) (a) and (14,14) (b) TACNNTs.

(a)

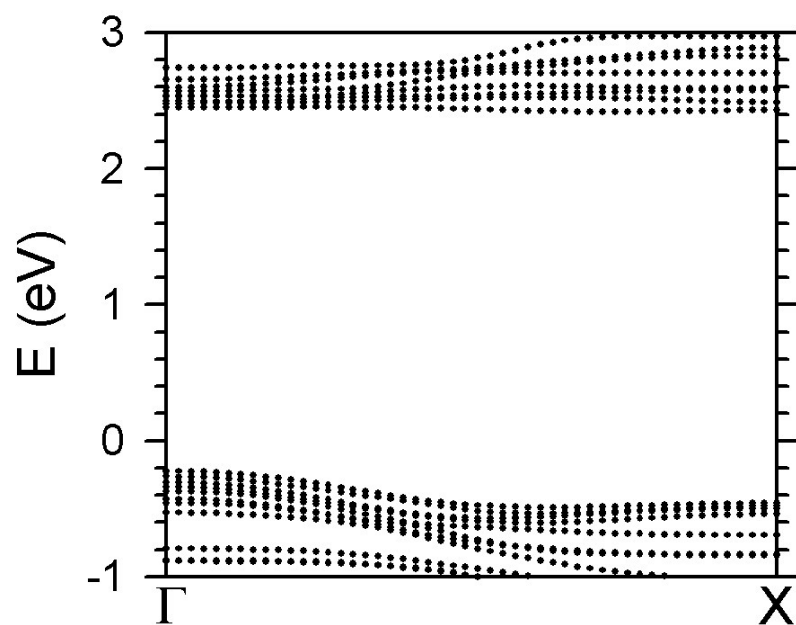

(b)

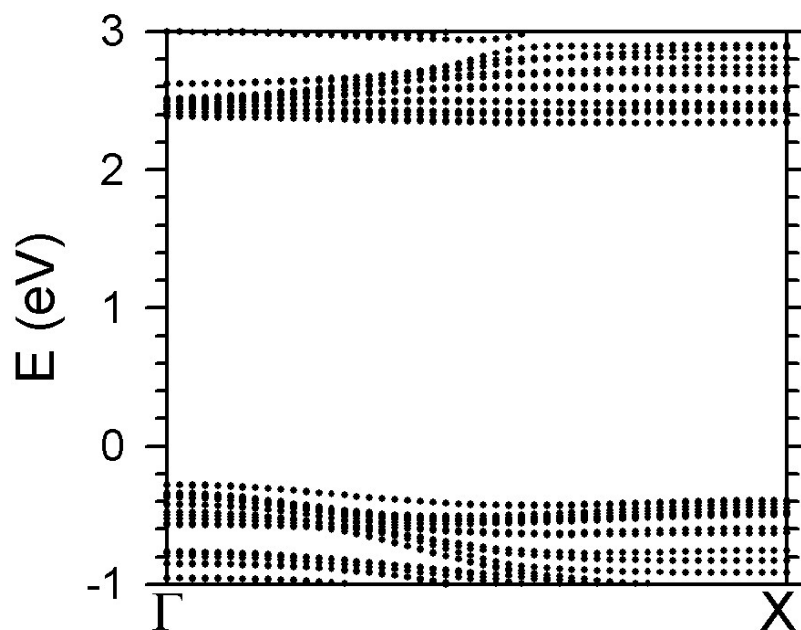

**Figure S3.** The band structures of  $P_g^-$  (a) and  $P_p^0$  (b) doped (14,0) TACNNTs, where  $P_g$  and  $P_p^0$  denote the graphitic and outward pyridinelike phosphorus atoms, respectively.

(a)

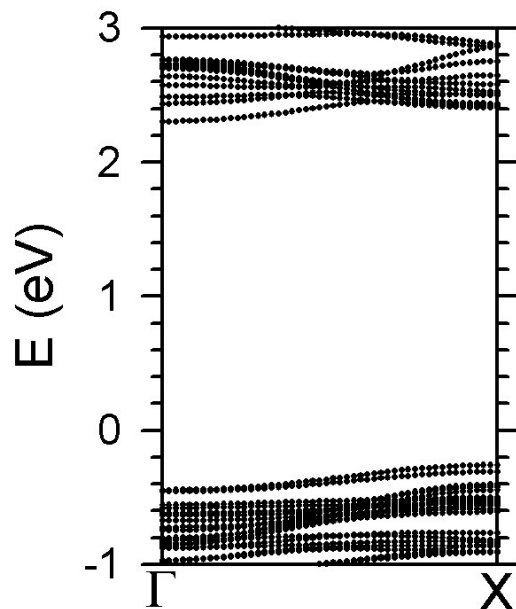

(b)

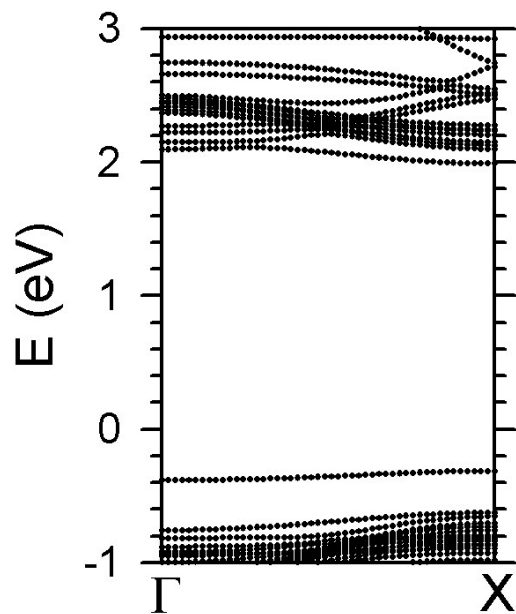

**Figure S4.** The band structures of FF (a) and FR (b) configurations for (10,0) $@P_g$ -(20,0) TACNNT.

(a)

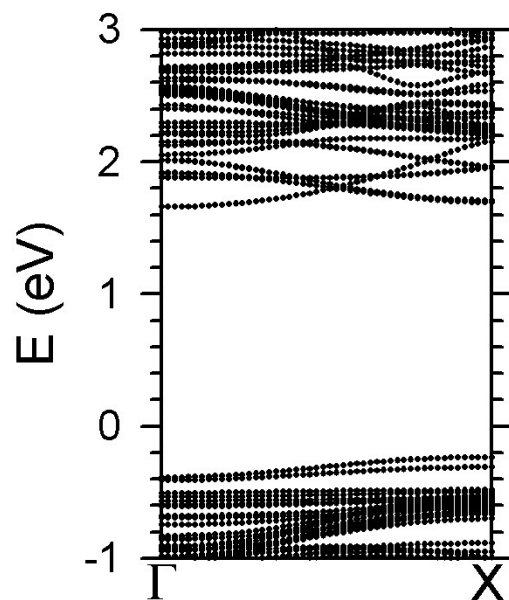

(b)

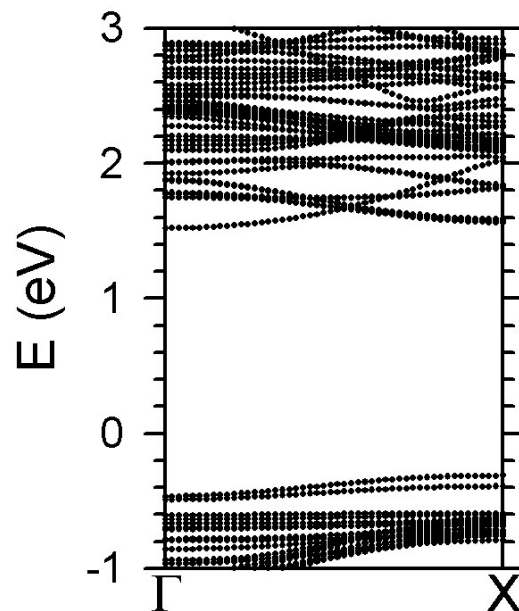

**Figure S5.** The band structures of FF (a) and FR (b) configurations for  $(10,0)@P_p^o-(20,0)$  TACNNT.

(a)

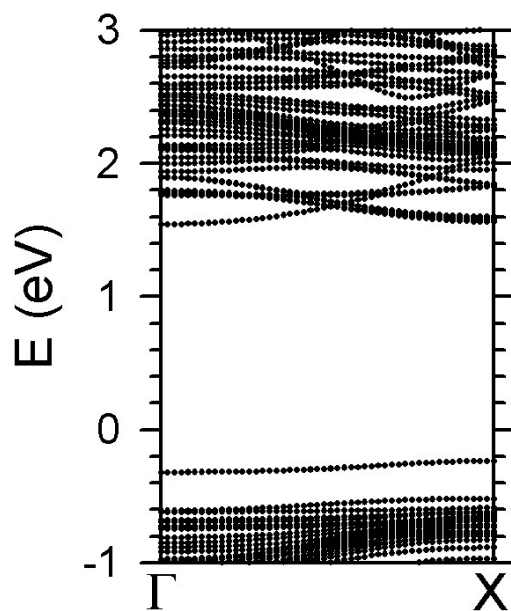

(b)

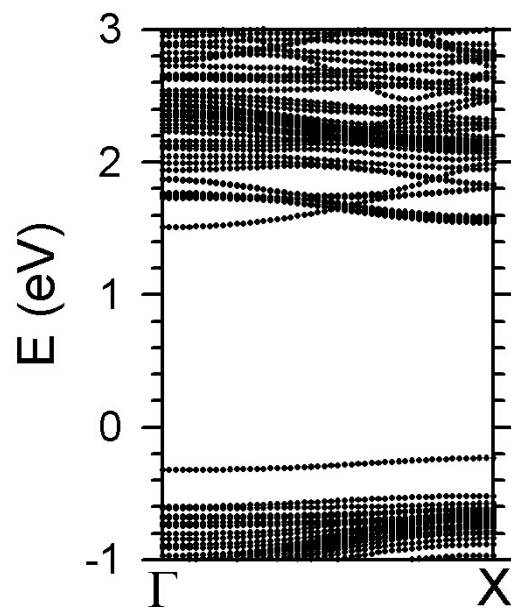

Supplement: c4ra15034a1.pdf [file c4ra15034a1.pdf]
